# **A structural equation modelling approach to understanding the determinants of childhood vaccination in Nigeria, Uganda and Guinea**

James Bell<sup>1</sup>, Belinda Lartey<sup>1</sup>, Marcos Fernandez<sup>1</sup>, Natasha Darrell<sup>1</sup>, Holly Exton-Smith<sup>1</sup>, Cassie Gardner<sup>1</sup>, Emily Richards<sup>1</sup>, Abolaji Akilo<sup>2</sup>, Emmanuel Odongo<sup>3</sup>, James Ssenkungu<sup>3</sup>, Rigobert Kotchi Kouadio<sup>4</sup>, Mamadi Cissé<sup>5</sup>, Axel Bruno Ayiya Igowa Rérambyah<sup>6</sup>, Maikol Adou<sup>6</sup>, Rebecca West<sup>1,7</sup>, Sunny Sharma<sup>1</sup>

1: Ipsos Healthcare, London, UK

2: Ipsos Nigeria, Lagos, Nigeria

3: Ipsos Uganda, Kampala, Uganda

4: Ciblage, Dakar, Senegal

5: Ciblage, Conakry, Guinea

6: Ciblage, Abidjan, Ivory Coast

7: Boston University School of Public Health, Boston, United States

<sup>1</sup> Corresponding author ([jamesgbell2@gmail.com](mailto:jamesgbell2@gmail.com))

**NOTE: This preprint reports new research that has not been certified by peer review and should not be used to guide clinical practice.**

## 23 **Abstract**

24 Vaccines have contributed to reductions in morbidity and mortality from preventable diseases  
25 globally, but low demand for vaccination threatens to reverse these gains. Explorations of the  
26 determinants of vaccination uptake may rely on proxy variables to describe complex phenomena and  
27 construct models without reference to underlying theories of vaccine demand. This study aimed to  
28 use the results of a formative qualitative study (described elsewhere) to construct and test a model  
29 to explain the determinants of vaccination uptake. Using the results of a survey among more than  
30 3,000 primary caregivers of young children in Nigeria, Uganda and Guinea, factor analysis produced  
31 six explanatory factors. We then estimated the effects of each of these factors on uptake of  
32 immunization using a structural equation model. The results showed that the probability that a child  
33 is fully vaccinated increases if a caregiver has support from others to vaccinate them ( $B= 0.33$ ,  $\beta= 0.21$ ,  
34  $p<0.001$ ) and if caregivers had poor experiences with the healthcare system ( $B= 0.09$ ,  $\beta= 0.09$ ,  $p=$   
35  $0.007$ ). Conversely, the probability of full vaccination decreases if the caregiver's husband exerts  
36 control over her decision-making ability ( $B= -0.29$ ,  $\beta = -0.20$ ,  $p<0.001$ ) , or if the caregiver perceives  
37 vaccines to be of low importance ( $B= -0.37$ ,  $\beta= -0.27$ ,  $p<0.001$ ). Belief in religious protection ( $B= -0.07$ ,  
38  $\beta= -0.05$ ,  $p=0.118$ ) and a belief that vaccines are harmful ( $B= -0.12$ ,  $\beta= -0.04$ ,  $p= 0.320$ ) did not have an  
39 observed effect on vaccination status . This research suggests that interventions may benefit from  
40 that including entire families and communities in their design.

## 42 **Introduction**

43 Since the establishment of the Expanded Programme on Immunization (EPI) in 1974, vaccinations have  
44 contributed to significant reductions in deaths from preventable childhood diseases in low and middle  
45 income countries (1). However in recent years vaccination coverage has plateaued or even decreased  
46 in some regions, which jeopardises achieving the Immunization Agenda 2030 goal of reducing  
47 mortality and morbidity from vaccine-preventable diseases (2,3). In the World Health Organisation  
48 (WHO) Africa region, for instance, it was estimated that in 2019, 9.4 million children were under- or  
49 unvaccinated, which risks epidemics of infectious disease (4).

50

51 Low demand for vaccination among caregivers of young children contributes to stagnating coverage  
52 rates across Africa (5). There are various ways to define demand for vaccination, but UNICEF and the  
53 World Health Organisation (WHO) describe it as ‘the actions of individuals and communities to seek,  
54 support and/ or advocate for vaccines and vaccination services’ (5). Research on this topic in sub-  
55 Saharan Africa proposes that demand for vaccination is informed by family and community priorities  
56 and power structures; belief in traditional or religious forms of disease prevention; the exchange of  
57 information (including rumours and conspiracy theories) in communities; personal experience of  
58 vaccination; and interactions with healthcare systems and providers at the point of delivery (6–18).

59

60 The research on vaccine demand to date suggests that many inter-dependent and context-specific  
61 factors contribute to uptake of vaccination services (19). Despite this, quantitative analyses of  
62 determinants of demand or uptake of vaccination are rarely based on an underlying theory, may use  
63 single variables as proxies for complex and multidimensional factors, and often use statistical models  
64 that do not consider the relationships between constructs that drive demand for vaccination in the  
65 real world. For example, as Degarege et al. have pointed out, studies of demand for routine  
66 vaccination in India typically assume direct relationships between individual sociodemographic,  
67 environmental and psychological variables and the endpoint in logistic regression models (20).

68 Research which uses an evidence-based theoretical model of vaccine demand and statistical methods  
69 that can account for the multi-faceted determinants of demand and complex relationships between  
70 them is required to better understand this topic (21). Consequently, the aims of this study were to i)  
71 propose a theoretical model for vaccination demand based on published literature and formative  
72 qualitative research, ii) use data from quantitative surveys of caregivers of young children to test the  
73 overall fit of the model to the theory, and iii) understand the comparative importance of predictors of  
74 vaccine demand.

75  
76

## 77 **Methods**

### 78 *Setting*

79 The research was conducted in Nigeria, Uganda and Guinea, which were chosen to represent African  
80 countries with a range of vaccination coverage rates. Among the three, Guinea has the lowest  
81 coverage (23.9%) of the basic vaccines recommended by the Expanded Programme on Immunization  
82 (EPI), which are the Bacillus Calmette Guerin vaccine for TB, three doses of DTP-HepB-Hib against  
83 diphtheria, tetanus, pertussis, Hepatitis B and Haemophilus influenzae b, three doses of oral polio and  
84 one dose of measles (22). Nigeria's coverage was reported at 31.3% and Uganda has the highest  
85 coverage among the study geographies, at 55.2% (23,24). In an analysis of Demographic and Health  
86 (DHS) vaccination coverage surveys, Guinea had the lowest percentage of fully vaccinated children of  
87 the 25 countries included, Nigeria ranked 22/25 and Uganda 16/25 (25).

88

### 89 *Data Collection*

90 Data were collected using a questionnaire (S2 File), designed using the results of a formative  
91 qualitative study (19) and a literature review. The questionnaire collected demographic data,  
92 household income, and the vaccination status of the participant's child, as well as perceptual  
93 information on their family and community relationships, traditional and religious beliefs, methods of  
94 child protection and attitudes to vaccination and vaccination services. The survey contained attitude  
95 statements on these topics, to which participants indicated their agreement or disagreement using a  
96 5-point Likert scale. The questionnaire was translated into Yoruba, Hausa and Igbo in Nigeria; Luganda,

97 Runyankole, Samia, Japadhola and Acholi in Uganda; and French in Guinea, so that enumerators could  
98 interpret the questions into Malinké, Soussou or Peul, as required. The survey was administered by  
99 trained enumerators using Computer Assisted Personal Interviewing (CAPI) devices. Enumerators  
100 were trained over the course of four days in each country.

101

102 The research was conducted in six states in Nigeria (Lagos, Kano, Enugu, Sokoto, Nasarawa and Rivers),  
103 five regions in Uganda (Acholi, Bukedi, Kampala, North Central and Ankole) and five regions in Guinea  
104 (Boké, Conakry, N'Zérékoré, Mamou and Kankan). The regions were selected non-randomly with in-  
105 country stakeholders (including EPI and government representatives) to include a range of cultural  
106 groups and vaccination coverage rates. A multi-stage, stratified sampling methodology was used in  
107 each of the regions to select households for interview. Details are given in the Supplementary  
108 Materials (S1 File) as the exact procedure varied by country. In general, the sample was stratified by  
109 urban or rural setting within each region. Lower-level geographic areas were selected within each  
110 stratum and a starting point determined. Households were then selected following a random walk  
111 procedure, a household census was taken, and eligible respondents were selected (using a Kish grid if  
112 more than one was present). Participants were eligible if they had primary responsibility for the care  
113 of a child between 1 and 3 years old. Both male and female participants were eligible for inclusion.

114

115 Written informed consent was secured from all participants. An honorarium was provided in the form  
116 of a small household item in Nigeria (approximate value of 1000 NGN/ 2.40 USD) and Uganda (5,300  
117 UGX/ 1.50 USD) and in cash in Guinea (369,000 FG/ 40 USD). The study protocol received approval  
118 from Makerere University College of Health Sciences Review Board in Uganda (Ref: 724), the National  
119 Health Research Ethics Committee of Nigeria (Approval number: NHREC/01/01/2007-25/09/2019)  
120 and the Comité Nationale d'Ethique pour la Recherche en Santé in Guinea (Ref: 026/CNERS/20).

121

122 *Analysis*

123 Analyses were carried out in R v.4.0.2 using the psych and lavaan packages (26,27). The data and  
 124 analysis scripts are available in a Github repository [link:  
 125 [https://github.com/jamesbell1991/Vaccines\\_Structural\\_Equation\\_Modelling](https://github.com/jamesbell1991/Vaccines_Structural_Equation_Modelling)].

126  
 127 The structural equation modelling process broadly followed the protocol detailed by Schumacker and  
 128 Lomax (28). Firstly, a factor analysis was conducted on several Likert-scale questions in the survey.  
 129 The approach was a combination of exploratory analysis (in that no definite factor structure was  
 130 predetermined) and confirmatory analysis (in that variables were grouped together in themes in  
 131 advance of the analysis) as described by Kang et al (29). The final factors were determined through an  
 132 examination of scree plots and factor loadings to produce six factors. Variables with a factor loading  
 133 less than 0.3 were considered a poor fit.

134  
 135 The composition of these factors and the theoretical basis for including them was arrived at using the  
 136 results of a literature review and previous qualitative research (Table 1).

137  
 138 Table 1: Factor structure and their theoretical justifications  
 139

| <b>Factor</b>                     | <b>Component variables</b>                                                                                                                                                                                                                                                                         | <b>Rationale for inclusion</b>                                                                                                                                                                                                                                                                                                                                                                         |
|-----------------------------------|----------------------------------------------------------------------------------------------------------------------------------------------------------------------------------------------------------------------------------------------------------------------------------------------------|--------------------------------------------------------------------------------------------------------------------------------------------------------------------------------------------------------------------------------------------------------------------------------------------------------------------------------------------------------------------------------------------------------|
| Belief in religious protection    | <ul style="list-style-type: none"> <li>● My religious faith protects me and my family from harm</li> <li>● My religious faith heals me and my family from illnesses</li> <li>● God is the only protection needed against harm</li> <li>● My religious faith guides decisions in my life</li> </ul> | The vaccine demand literature suggests that religious belief could play a part in reducing demand for childhood vaccination (30–32). Our qualitative study, however, concludes that religious belief has little direct bearing on uptake of vaccination, but that the gender norms Christianity and Islam uphold may reduce a caregiver’s capability to seek vaccination in more circuitous ways (19). |
| Control of husband over decisions | <ul style="list-style-type: none"> <li>● When a man makes a decision, no one in the family should question it</li> <li>● Disagreements between a husband and wife should not be talked about outside of the home</li> </ul>                                                                        | Previous studies have concluded that the influence of a caregiver’s husband is important in encouraging or discouraging vaccination                                                                                                                                                                                                                                                                    |

|                                                       |                                                                                                                                                                                                                                                                                                                                                                                                             |                                                                                                                                                                                                                                                                                                                                                                                                                                                                                                                           |
|-------------------------------------------------------|-------------------------------------------------------------------------------------------------------------------------------------------------------------------------------------------------------------------------------------------------------------------------------------------------------------------------------------------------------------------------------------------------------------|---------------------------------------------------------------------------------------------------------------------------------------------------------------------------------------------------------------------------------------------------------------------------------------------------------------------------------------------------------------------------------------------------------------------------------------------------------------------------------------------------------------------------|
|                                                       | <ul style="list-style-type: none"> <li>● A man should monitor his wife to make sure she does the right things</li> <li>● I am worried about being blamed if I make a decision for my child and something goes wrong</li> </ul>                                                                                                                                                                              | seeking (9,16). Our qualitative study reinforced this finding (19).                                                                                                                                                                                                                                                                                                                                                                                                                                                       |
| Support for vaccination from others                   | <ul style="list-style-type: none"> <li>● My spouse/ partner helped/ ensured that my child was vaccinated</li> <li>● My mother/ mother-in-law helped ensured that my child was vaccinated</li> <li>● It is normal in this community to vaccinate your children</li> <li>● Religious leaders are supportive of vaccination</li> <li>● I trust that the government knows what is right for children</li> </ul> | Building norms around vaccination is understood to be important, as are the support of family members and religious leaders and trust in government and public institutions (7,8,10,12,33–35). Our qualitative study found that family, friends and neighbours were important in setting vaccination norms, and that low trust in institutions contributed to suspicion of vaccines (19).                                                                                                                                 |
| Belief that vaccinations are not important/ necessary | <ul style="list-style-type: none"> <li>● I travel a lot so it's hard to take my children to get vaccinated</li> <li>● I am too busy to go to the clinic for vaccinations</li> <li>● There are no benefits to vaccination</li> <li>● Children who have not had vaccinations are usually healthy</li> <li>● There are other ways I can protect my child from disease</li> </ul>                               | Lack of awareness and understanding of immunization and the disease they prevent is understood as a foundational barrier to increasing demand for vaccinations (9). Parents may not always view vaccines as necessary if they do not perceive vaccine-preventable diseases as a threat (36). Parents may have conflicting priorities, which reduce the likelihood that a child will be vaccinated (9,19,35,37,38). Communities may also have other ways to protect children which are more culturally embedded (9,19,39). |
| Poor service delivery experience                      | <ul style="list-style-type: none"> <li>● The staff in the hospital are rude to me</li> <li>● The clinic or hospital is dirty</li> <li>● The queues are too long</li> </ul>                                                                                                                                                                                                                                  | Literature on vaccination demand, including our qualitative study, has consistently shown that poor experiences of the healthcare system contribute to low vaccination uptake (7–10,12,14,19,33,40).                                                                                                                                                                                                                                                                                                                      |
| Belief that vaccines are harmful                      | <ul style="list-style-type: none"> <li>● Having many vaccinations at once is hard for children to bear</li> <li>● It is difficult to manage the side effects of vaccination</li> <li>● Vaccines are a way to control us</li> </ul>                                                                                                                                                                          | Side-effects are a commonly cited concern about vaccinations among caregivers (7). Vaccination rumours have also been shown to contribute                                                                                                                                                                                                                                                                                                                                                                                 |

---

to low uptake  
(7,9,15,19,34,37,38,41–43).  
There is also some evidence  
that caregivers may believe  
too many vaccines are  
administered at once (7).

---

140  
141 Using these six factors, a structural equation model structure was developed with children's  
142 vaccination status as the dependent/outcome variable. Vaccination status was determined using an  
143 adapted version of the protocol used by DHS (44). If available, the vaccines a child had received were  
144 determined using the child's vaccination card. If not available, status was determined by parental  
145 reporting, which was not otherwise verified (e.g., through clinic records). For the analysis a  
146 dichotomous variable was created to compare children who have completed the full schedule (taking  
147 a value of 1) or who have had no doses or some doses but not enough to complete the full schedule  
148 (taking a value of 0).

149  
150 As shown in Figure 1, it was hypothesized that each factor had a direct relationship with the outcome.  
151 Existing literature and our previous qualitative study do not support any hypothesized relationships  
152 between the factors.

153  
154 Fig 1: Proposed model structure

155  
156  
157 The model used a probit link function, to account for the dichotomous outcome variable. Modification  
158 indices were examined and additions or deletions to the model were considered. Several goodness of  
159 fit indices were examined. No definitive cut-off points were adopted, but the guidance that RMSEA  
160 <0.08, TLI >0.90, CFI >0.90 and SRMR <0.08 indicate acceptable fit was used (45). A  $X^2$  test was not  
161 included due to its sensitivity to sample size (28). Finally, as the countries involved in the study may  
162 be heterogenous, models were run for each country separately, the results of which are given in the  
163 Supplementary Materials (S3 File).

164



165 All tables and figures presented contain sample statistics and have not been weighted to population  
166 data.

167  
168

## 169 **Results**

### 170 *Description of study participants*

171 A total of 3,318 interviews were completed. These took place in Nigeria and Uganda between  
172 November and December 2020 and in Guinea between July and August 2021 (later due to resource  
173 constraints which prevented the three surveys from running concurrently). Just under a third of  
174 interviews were conducted in rural areas (Table 2). Most participants (78.8%) were under the age of  
175 35. Education levels varied by country: in Nigeria, 56.5% of participants had secondary or higher  
176 education, whereas in Uganda most participants had primary education (55.1%). In Guinea, 52.2% of  
177 participants had no formal education, the highest of the three countries. In all countries most  
178 participants were in the low-income band (see note to Table 2 for definition). 96.0% of participants  
179 were the child’s biological mother. Vaccination status of the sample varied by country, with Uganda  
180 reporting 60.4% of children fully vaccinated, and lower percentages in Nigeria and Guinea (36.1% and  
181 40.0%, respectively).

182  
183  
184

Table 2: Description of study sample

|                      | <b>Nigeria<br/>(N=1264)</b> | <b>Uganda<br/>(N=1054)</b> | <b>Guinea<br/>(N=1000)</b> | <b>Total<br/>(N=3318)</b> |
|----------------------|-----------------------------|----------------------------|----------------------------|---------------------------|
| <b>Setting</b>       |                             |                            |                            |                           |
| Urban                | 489 (38.7%)                 | 406 (38.5%)                | 363 (36.3%)                | 1258 (37.9%)              |
| Rural                | 775 (61.3%)                 | 648 (61.5%)                | 637 (63.7%)                | 2060 (62.1%)              |
| <b>Age</b>           |                             |                            |                            |                           |
| 18-24                | 261 (20.6%)                 | 358 (34.0%)                | 262 (26.2%)                | 881 (26.6%)               |
| 25-29                | 406 (32.1%)                 | 312 (29.6%)                | 340 (34.0%)                | 1058 (31.9%)              |
| 30-34                | 268 (21.2%)                 | 191 (18.1%)                | 214 (21.4%)                | 673 (20.3%)               |
| 35-39                | 216 (17.1%)                 | 124 (11.8%)                | 131 (13.1%)                | 471 (14.2%)               |
| 40-44                | 83 (6.6%)                   | 48 (4.6%)                  | 33 (3.3%)                  | 164 (4.9%)                |
| 45-49                | 26 (2.1%)                   | 15 (1.4%)                  | 16 (1.6%)                  | 57 (1.7%)                 |
| 50-56                | 4 (0.3%)                    | 6 (0.6%)                   | 4 (0.4%)                   | 14 (0.4%)                 |
| <b>Education</b>     |                             |                            |                            |                           |
| No formal education  | 387 (30.6%)                 | 74 (7.0%)                  | 522 (52.2%)                | 983 (29.6%)               |
| Primary              | 163 (12.9%)                 | 581 (55.1%)                | 185 (18.5%)                | 929 (28.0%)               |
| Secondary            | 530 (41.9%)                 | 319 (30.3%)                | 188 (18.8%)                | 1037 (31.3%)              |
| Higher education     | 184 (14.6%)                 | 79 (7.5%)                  | 77 (7.7%)                  | 340 (10.2%)               |
| Prefer not to answer | 0 (0%)                      | 1 (0.1%)                   | 28 (2.8%)                  | 29 (0.9%)                 |

| <b>Income level</b>               |                   |                   |                   |                   |
|-----------------------------------|-------------------|-------------------|-------------------|-------------------|
| Low                               | 730 (57.8%)       | 759 (72.0%)       | 543 (54.3%)       | 2032 (61.2%)      |
| Middle                            | 306 (24.2%)       | 228 (21.6%)       | 115 (11.5%)       | 649 (19.6%)       |
| High                              | 131 (10.4%)       | 24 (2.3%)         | 2 (0.2%)          | 157 (4.7%)        |
| Prefer not to say                 | 97 (7.7%)         | 43 (4.1%)         | 340 (34.0%)       | 480 (14.5%)       |
| <b>Number of children</b>         |                   |                   |                   |                   |
| Mean (SD)                         | 2.92 (1.89)       | 3.35 (2.29)       | 3.69 (2.18)       | 3.29 (2.13)       |
| Median [Min, Max]                 | 3.00 [1.00, 20.0] | 3.00 [1.00, 20.0] | 3.00 [1.00, 16.0] | 3.00 [1.00, 20.0] |
| <b>Relationship to child</b>      |                   |                   |                   |                   |
| Biological mother                 | 1195 (94.5%)      | 1038 (98.5%)      | 953 (95.3%)       | 3186 (96.0%)      |
| Stepmother                        | 18 (1.4%)         | 4 (0.4%)          | 3 (0.3%)          | 25 (0.8%)         |
| Aunt                              | 40 (3.2%)         | 7 (0.7%)          | 16 (1.6%)         | 63 (1.9%)         |
| Grandmother                       | 3 (0.2%)          | 4 (0.4%)          | 0 (0%)            | 7 (0.2%)          |
| Biological father                 | 7 (0.6%)          | 1 (0.1%)          | 4 (0.4%)          | 12 (0.4%)         |
| Stepfather                        | 1 (0.1%)          | 0 (0%)            | 2 (0.2%)          | 3 (0.1%)          |
| Other                             | 0 (0%)            | 0 (0%)            | 22 (2.2%)         | 22 (0.7%)         |
| <b>Child's vaccination status</b> |                   |                   |                   |                   |
| Not vaccinated                    | 143 (11.3%)       | 87 (8.3%)         | 106 (10.6%)       | 336 (10.1%)       |
| Partially vaccinated              | 665 (52.6%)       | 330 (31.3%)       | 494 (49.4%)       | 1489 (44.9%)      |
| Fully vaccinated                  | 456 (36.1%)       | 637 (60.4%)       | 400 (40.0%)       | 1493 (45.0%)      |

185 Note: Income bands per country (per month). Low: Nigeria (Below 50,000 NGN), Uganda (Below  
 186 500,000 UGX), Guinea (Below 1,983,626 GNF); Middle: Nigeria (50,0001-500,000 NGN), Uganda  
 187 (501,000-2,000,000 UGX), Guinea (1,983,627-4,999,999 GNF); High: Nigeria (Above 800,0001 NGN),  
 188 Uganda (Above 2,000,000 UGX), Guinea (Above 5,000,000 GNF)

189  
 190 *Measurement Model*

191 The measurement model corresponding to the six latent factors in Table 1 fitted the data reasonably  
 192 well (RMSEA = 0.04, TLI = 0.88, CFI = 0.89, SRMR = 0.04). To improve the fit further, we allowed some  
 193 residual terms within the same construct to covary (My spouse/ partner helped/ ensured that my child  
 194 was vaccinated with My mother/ mother-in-law helped/ ensured that my child was vaccinated and It  
 195 is normal in this community to vaccinate your children with Religious leaders are supportive of  
 196 vaccination), resulting in the final measurement model (Table 3). One variable (Disagreements  
 197 between a husband and wife are private and should not be talked about outside the home) had a  
 198 standardised factor loading of 0.294 but was retained in the model as its removal did not appreciably  
 199 improve the fit statistics.

Table 3: Measurement Model Factor Loadings and Fit Statistics

| Factor                                                       | Variable                                                                                             | Factor loading | Standard error | P-value | Standardised factor loading |
|--------------------------------------------------------------|------------------------------------------------------------------------------------------------------|----------------|----------------|---------|-----------------------------|
| <b>Belief in religious protection</b>                        | My religious faith protects me and my family from harm                                               | 1.000          |                |         | 0.755                       |
|                                                              | My religious faith heals me and my family from illnesses                                             | 1.196          | 0.037          | <0.001  | 0.708                       |
|                                                              | God is the only protection needed against harm                                                       | 0.617          | 0.023          | <0.001  | 0.553                       |
|                                                              | My religious faith guides decisions in my life                                                       | 0.710          | 0.024          | <0.001  | 0.612                       |
| <b>Control of husband over decisions</b>                     | When a man makes a decision, no one in the family should question it                                 | 1.000          |                |         | 0.498                       |
|                                                              | A man should monitor his wife to make sure she does the right things                                 | 0.827          | 0.059          | <0.001  | 0.522                       |
|                                                              | Disagreements between a husband and wife are private and should not be talked about outside the home | 0.474          | 0.045          | <0.001  | 0.294                       |
|                                                              | I am worried about being blamed if I make a decision for my baby/ child and something goes wrong     | 0.542          | 0.050          | <0.001  | 0.301                       |
| <b>Support for vaccination from others</b>                   | My spouse / partner helped/ ensured that my child was vaccinated                                     | 1.000          |                |         | 0.542                       |
|                                                              | My mother/ mother-in-law helped/ ensured that my child was vaccinated                                | 1.045          | 0.045          | <0.001  | 0.512                       |
|                                                              | It is normal in this community to vaccinate your children                                            | 0.778          | 0.037          | <0.001  | 0.612                       |
|                                                              | Religious leaders are supportive of vaccination                                                      | 0.747          | 0.040          | <0.001  | 0.485                       |
|                                                              | I trust that the government knows what is right for children                                         | 0.891          | 0.045          | <0.001  | 0.541                       |
| <b>Belief that vaccinations are not important/ necessary</b> | I travel a lot so it's hard to take my child to get vaccinated                                       | 1.000          |                |         | 0.528                       |
|                                                              | I am too busy to go to the clinic or hospital for vaccinations                                       | 1.115          | 0.047          | <0.001  | 0.528                       |
|                                                              | There are no benefits to vaccination                                                                 | 1.123          | 0.058          | <0.001  | 0.561                       |
|                                                              | Children who have not had vaccinations are usually healthy                                           | 1.059          | 0.058          | <0.001  | 0.497                       |
| <b>Poor service delivery experience</b>                      | There are other ways I can protect my child from disease                                             | 0.732          | 0.052          | <0.001  | 0.334                       |
|                                                              | The staff in the hospital are rude to me                                                             | 1.000          |                |         | 0.612                       |
|                                                              | The clinic or hospital is dirty                                                                      | 1.029          | 0.058          | <0.001  | 0.664                       |
| <b>Belief that vaccines are harmful</b>                      | The queues are too long at the clinic/ hospital where the vaccination takes place                    | 0.455          | 0.035          | <0.001  | 0.309                       |
|                                                              | Having many vaccinations at once is hard for children to bear                                        | 1.00           |                |         | 0.356                       |
|                                                              | It is difficult for me to manage the side effects (fever, rash, pain) of vaccination                 | 1.843          | 0.139          | <0.001  | 0.586                       |
|                                                              | Vaccines are a way for global/western countries/organisations to control us                          | 1.682          | 0.128          | <0.001  | 0.530                       |
| RMSEA = 0.04, TLI = 0.90, CFI = 0.91, SRMR = 0.04            |                                                                                                      |                |                |         |                             |

200 *Structural Model*

201 The fit statistics for the model indicate acceptable model fit: RMSEA = 0.04, TLI = 0.91, CFI = 0.92,  
202 SRMR = 0.04. Modification indices were examined, but none were logical within the theoretical  
203 framework so none were adopted.

204  
205 *Factors affecting uptake of childhood vaccination*

206 Some factors are associated with a reduction in the probability that a child would be vaccinated, while  
207 others lead to an observed increase in the probability of vaccination, and others were unassociated  
208 with the outcome. (Table 4).

209  
210 Table 4: Unstandardised (B) and standardised ( $\beta$ ) effects of factors affecting vaccination in the  
211 structural model

| Factor                                                | B (95% CI)           | $\beta$ (95% CI)     | P-value |
|-------------------------------------------------------|----------------------|----------------------|---------|
| Belief in religious protection                        | -0.07 (-0.17, 0.02)  | -0.05 (-0.11, 0.01)  | 0.118   |
| Control of husband over decisions                     | -0.29 (-0.43, -0.14) | -0.20 (-0.29, -0.11) | <0.001  |
| Support for vaccination from others                   | 0.33 (0.19, 0.46)    | 0.21 (0.13, 0.30)    | <0.001  |
| Belief that vaccinations are not important/ necessary | -0.37 (-0.51, -0.22) | -0.27 (-0.37, -0.17) | <0.001  |
| Poor service delivery experience                      | 0.09 (0.02, 0.16)    | 0.09 (0.03, 0.16)    | 0.007   |
| Belief that vaccines are harmful                      | -0.12 (-0.37, 0.12)  | -0.04 (-0.13, 0.04)  | 0.320   |

213  
214 Lower probability of vaccination was observed for those who expressed higher levels of perceived  
215 control of the husband over decision-making (B -unstandardised effect= -0.29,  $\beta$ - standardised effect  
216 = -0.20,  $p < 0.001$ ). The unstandardised effect can be interpreted to mean that when this variable  
217 increases by one unit, the z-score for probability of being fully vaccinated decreases by 0.29 units. The  
218 standardised coefficient can be interpreted to mean that when this variable is increased by one  
219 standard deviation, the z-score score for probability of being fully vaccinated decreases by 0.20  
220 standard deviations. Lower probability was also observed for those who expressed higher levels of  
221 belief that vaccinations are not important or necessary (B= -0.37,  $\beta$ = 0.27,  $p < 0.001$ ). Higher  
222 probabilities of vaccination were observed for participants who said that they had higher levels of  
223 support for vaccination from others around them (B= 0.33,  $\beta$ = 0.21,  $p < 0.001$ ) and among those who  
224 had worse service delivery experiences (B= 0.09,  $\beta$ = 0.09,  $p = 0.007$ ). There was little evidence that

225 belief in religious protection ( $B = -0.07$ ,  $\beta = -0.05$ ,  $p = 0.118$ ) or belief that vaccines are harmful ( $B = -0.12$ ,  
226  $\beta = -0.04$ ,  $p = 0.320$ ) increased or decreased the probability of vaccination.

227

228 In a comparison of the standardised coefficients ( $\beta$ ), the factor with the strongest positive observed  
229 impact on vaccination was having support from others to vaccinate. The strongest negative impacts  
230 were observed for those who expressed high degrees of control of decisions by the husband, and  
231 stronger beliefs that vaccinations were not important or necessary.

232

233

## 234 **Discussion**

235 This study used structural equation modelling to examine factors associated with uptake of childhood  
236 vaccination among primary caregivers in Uganda, Guinea and Nigeria. The results suggest that  
237 vaccination uptake is informed by family and community relationships, service delivery experience  
238 and attitudes and beliefs towards vaccination. Elements of the findings were consistent with existing  
239 research on this topic. Higher levels of spousal control over decision-making were again linked to lower  
240 likelihood to vaccinate, the role of community norms in encouraging vaccination was reaffirmed, and  
241 the importance of belief in the necessity of vaccines in the context of other priorities was observed  
242 (9,10,12). The study also provides new contributions to our understanding of the determinants of  
243 vaccine demand in several ways. Thematically, the study gives alternative perspectives on the role of  
244 religious belief and healthcare service experience compared to what is prevalent in the literature.  
245 Conceptually, the work departs from standard methodologies employed in vaccine demand research  
246 by using analytical approaches that account for the complexity of the factors that inform vaccine  
247 uptake, and which are based on underlying data-driven theories of behaviour.

248

249 Given what is reported elsewhere in the literature, two of the study's conclusions may appear  
250 surprising. Others have suggested that caregiver belief in religious protection may decrease likelihood  
251 of vaccine uptake (30–32). Our findings do not support this hypothesis, which is in line with the results

252 of our qualitative research on the same topic (19). It is possible that religious protection and protection  
253 conferred by vaccines are seen as conceptually separate, and with different functions in child  
254 development. This means that interventions to increase demand for vaccination should be careful not  
255 to attempt to supplant belief in religious protection with a preference for vaccination. Interventions  
256 involving religious community leaders (such as have been attempted in Nigeria) could be fruitful  
257 avenues to ensure that different conceptions of child protection are viewed as complementary rather  
258 than adversarial (46–48).

259

260 It is well established that poor service delivery experiences may discourage caregivers from seeking  
261 vaccination (7–9,12–14,19). Even though the effect size observed in our study was small, it is surprising  
262 that our results suggest that caregivers who experience worse service delivery experience are more  
263 likely to have fully vaccinated children. There are several possible explanations for this finding. In the  
264 country-level analysis (presented in the Supplementary Materials, S3 File) the association is driven by  
265 the data from Guinea, which suggests that the finding may be due to sampling or cognitive biases in  
266 questionnaire responses that are specific to that country. Informal conversations with the fieldwork  
267 teams revealed that participants were at times unwilling to give negative opinions about the  
268 government, which may have affected responses to the variables comprising this factor. Alternatively,  
269 it is theoretically plausible that those who had fully vaccinated children are more dissatisfied with the  
270 experience of vaccinating at the clinic, compared to those with un- or under-vaccinated children, who  
271 will have had fewer touchpoints with health services. Finally, the result could have been the result of  
272 uncontrolled confounding by variables that were not included in the model.

273

274 Our study's results also support the idea that vaccination uptake is not determined solely by the  
275 attitudes and behaviours of the child's primary caregiver, but by a range of intersecting familial,  
276 community and social influences. This suggests that 'whole family' or 'whole community' intervention  
277 approaches could be impactful in these contexts. Programmes based on principles of collectivism

278 encourage families and communities to adopt a desired behaviour together, and have shown promise  
279 in other policy areas and geographies (49,50).

280

281 When the analysis is done separately by country, some differences by geography are noted. In Nigeria,  
282 support from others is observed to drive vaccination uptake, and bad service delivery impedes it. In  
283 Uganda, practical difficulties are the sole barrier to uptake, and in Guinea support from others, bad  
284 service delivery and belief in religious protection increase the probability of vaccination and belief that  
285 vaccinations are harmful decreases it. These differences mean that interventions should ensure that  
286 local contexts are taken into account when designing strategies to encourage adoption of vaccination.

287

288 This study moved beyond the standard approach in many explorations of predictors of childhood  
289 vaccination demand, which may rely on observed variables only as model inputs. Determinants of  
290 demand are often multifaceted in nature, necessitating the use of latent variables or constructs (21).  
291 In this way, our study was able to engage with the complexity of the phenomenon more holistically in  
292 its analytical approach. In addition, our analysis was also explicitly based on themes identified through  
293 prior qualitative research. A research-based approach, and the choice of structural equation modelling  
294 as the analytical tool, ensured that the hypothesised relationships between the explanatory factors  
295 had an empirical basis and were stated explicitly rather than assumed. This may result in models that  
296 reflect more closely how decisions around vaccination play out in the real world, which may make  
297 resulting interventions more appropriate.

298

299 Further research on this topic could undertake more complex analysis than has been attempted here.

300 This could include developing factors to describe other important constructs that may affect  
301 vaccination (such socio-economic status or belief in gender norms), proposing and testing more  
302 elaborate relational structures between factors, or the exploration of potential moderation or  
303 mediation between latent constructs.

304

305 *Limitations*

306 Some important limitations should be considered when evaluating the research findings. All answers  
307 were self-reported and not verified using external sources, so the vaccination outcome data may have  
308 been over- or under-stated. Attitudinal questions may have been affected by social desirability or  
309 recall biases. The sampling methodology should have resulted in regionally representative samples,  
310 but the random-walk methodology could have introduced sampling bias (51). The differences  
311 between the sampling protocols (as explained the Supplementary Materials) could also reduce  
312 comparability between countries.

313

314 The factors included in the model were partially determined by the availability of data, and therefore  
315 important constructs are likely absent from the analysis, rendering it an incomplete view of the  
316 determinants of vaccination uptake.

317

318 Finally, the standardised factor loading scores are considered low by many measures, meaning that  
319 the cohesiveness of the latent constructs and the regressions based on them are open to critique (52).  
320 The decision to combine data from three heterogeneous countries is also open to criticism as it may  
321 obscure country-level dynamics (but this is remedied by the inclusion of country-level models in the  
322 Supplementary Materials. S3 File).

323

324

## 325 **Conclusion**

326 Research on vaccination uptake often relies on proxy variables to represent complex phenomena and  
327 may not be based on an underlying theory of how vaccination decisions are made. This article uses  
328 the results of a formative qualitative study to construct and test a model to help explain determinants  
329 of vaccination uptake. We conclude that uptake is informed by family and community relationships,  
330 service delivery experience and attitudes and beliefs towards vaccination. The work has implications



331 for intervention design and suggests that approaches that include entire families and communities in  
332 interventions may be beneficial.

333

### 334 **Acknowledgments**

335 We would like to acknowledge the contributions of Virginia Nkwanzi, Alhassane Baldé, Mohamed

336 Dioubaté, Idalecio Agostinho das Neves, Possy Mugenyi, Lisa Oot, Kate Bagshaw, Rebecca Fields,

337 Ugochukwu Osigwe, Ndadilnasiya Endie Waziri, Yusuf Yusufari, Jenny Sequeira, Sarah Chesemore,

338 Wenfeng Gong, Anna Rapp, Tracy Johnson, Andrew Buhayar and Olesia Savateeva during the

339 fieldwork and analysis phases of the study, and the enumerators and participants involved in the

340 research.

## 342           **References**

- 343    1.   Keja K, Chan C, Hayden G, Henderson RH. Expanded programme on immunization. *World*  
344    Health Stat Q Rapp Trimest Stat Sanit Mond. 1988;41(2):59–63.
  
- 345    2.   Galles NC, Liu PY, Updike RL, Fullman N, Nguyen J, Rolfe S, et al. Measuring routine childhood  
346    vaccination coverage in 204 countries and territories, 1980–2019: a systematic analysis for the  
347    Global Burden of Disease Study 2020, Release 1. *The Lancet*. 2021 Aug 7;398(10299):503–21.
  
- 348    3.   Immunization Agenda 2030 [Internet]. [cited 2022 Feb 15]. Available from:  
349    <https://www.who.int/teams/immunization-vaccines-and-biologicals/strategies/ia2030>
  
- 350    4.   Progress and Challenges with Achieving Universal Immunization Coverage [Internet]. UNICEF  
351    and WHO; 2019. Available from: [https://cdn.who.int/media/docs/default-](https://cdn.who.int/media/docs/default-source/immunization/coverage/who-immuniz.pdf?sfvrsn=72fd7237_2&download=true)  
352    [source/immunization/coverage/who-immuniz.pdf?sfvrsn=72fd7237\\_2&download=true](https://cdn.who.int/media/docs/default-source/immunization/coverage/who-immuniz.pdf?sfvrsn=72fd7237_2&download=true)
  
- 353    5.   Hickler B, MacDonald NE, Senouci K, Schuh HB. Efforts to monitor Global progress on individual  
354    and community demand for immunization: Development of definitions and indicators for the  
355    Global Vaccine Action Plan Strategic Objective 2. *Vaccine*. 2017 Jun 16;35(28):3515–9.
  
- 356    6.   Cane J, O’Connor D, Michie S. Validation of the theoretical domains framework for use in  
357    behaviour change and implementation research. *Implement Sci*. 2012 Apr 24;7(1):37.
  
- 358    7.   Cobos Muñoz D, Monzón Llamas L, Bosch-Capblanch X. Exposing concerns about vaccination in  
359    low- and middle-income countries: a systematic review. *Int J Public Health*. 2015 Nov  
360    1;60(7):767–80.
  
- 361    8.   Dubé E, Laberge C, Guay M, Bramadat P, Roy R, Bettinger JA. Vaccine hesitancy. *Hum Vaccines*  
362    Immunother. 2013 Aug 1;9(8):1763–73.
  
- 363    9.   Favin M, Steinglass R, Fields R, Banerjee K, Sawhney M. Why children are not vaccinated: a  
364    review of the grey literature. *Int Health*. 2012 Dec;4(4):229–38.
  
- 365    10.   Kestenbaum LA, Feemster KA. Identifying and Addressing Vaccine Hesitancy. *Pediatr Ann*. 2015  
366    Apr;44(4):e71–5.
  
- 367    11.   Lane S, MacDonald NE, Marti M, Dumolard L. Vaccine hesitancy around the globe: Analysis of  
368    three years of WHO/UNICEF Joint Reporting Form data-2015-2017. *Vaccine*. 2018 Jun  
369    18;36(26):3861–7.
  
- 370    12.   MacDonald NE. Vaccine hesitancy: Definition, scope and determinants. *Vaccine*. 2015 Aug  
371    14;33(34):4161–4.
  
- 372    13.   Majid U, Ahmad M. The Factors That Promote Vaccine Hesitancy, Rejection, or Delay in  
373    Parents. *Qual Health Res*. 2020 Sep 1;30(11):1762–76.
  
- 374    14.   Mohanty S, Carroll-Scott A, Wheeler M, Davis-Hayes C, Turchi R, Feemster K, et al. Vaccine  
375    Hesitancy in Pediatric Primary Care Practices. *Qual Health Res*. 2018 Nov 1;28(13):2071–80.
  
- 376    15.   Yahya M. Polio Vaccines: ‘No Thank You!’ Barriers to Polio Eradication in Northern Nigeria. *Afr*  
377    Aff. 2007;106(423):185–204.

- 378 16. Feletto M, Sharkey A, Rowley E, Gurley N, Sinha A. A Gender Lens to Advance Equity in  
379 Immunization. Equity Reference Group for Immunization; 2018 Dec. (ERG Discussion Papers).  
380 Report No.: 05.
- 381 17. Levine O, Lemango E, Bernson J, Gurley N, Rowley E, Mcllvaine B. Tackling Inequities in  
382 Immunization Outcomes in Remote Rural Contexts. Equity Reference Group for Immunization;  
383 2018 Dec. (ERG Discussion Papers). Report No.: 08.
- 384 18. Okwo-Bele JM, Conner R, Mcllvaine B, Rowley E, Bernson J. Tackling Inequities in Immunization  
385 Outcomes in Conflict Contexts. Equity Reference Group for Immunization; 2018 Dec. (ERG  
386 Discussion Papers). Report No.: 06.
- 387 19. Bell J, Lartey B, Spickernell G, Darrell N, Salt F, Gardner C, et al. Applying a social-ecological  
388 model to understand factors impacting demand for childhood vaccinations in Nigeria, Uganda,  
389 and Guinea. *SSM - Qual Res Health*. 2022 Dec 1;2:100180.
- 390 20. Degarege A, Krupp K, Fennie K, Srinivas V, Li T, Stephens DP, et al. An integrative behavior  
391 theory derived model to assess factors affecting HPV vaccine acceptance using structural  
392 equation modeling. *Vaccine*. 2019 Feb 8;37(7):945–55.
- 393 21. Degarege A, Krupp K, Srinivas V, Ibrahimou B, Madhivanan P. Structural equation modeling to  
394 detect correlates of childhood vaccination: A moderated mediation analysis. *PLOS ONE*. 2020  
395 Oct 15;15(10):e0240749.
- 396 22. Institut National de la Statistique, ICF. Guinea Demographic and Health Survey (EDS V) 2016-18  
397 [Internet]. Conakry, Guinea: INS/Guinea and ICF; 2019. Available from:  
398 <http://dhsprogram.com/pubs/pdf/FR353/FR353.pdf>
- 399 23. National Population Commission - NPC, ICF. Nigeria Demographic and Health Survey 2018 -  
400 Final Report [Internet]. Abuja, Nigeria: NPC and ICF; 2019. Available from:  
401 <http://dhsprogram.com/pubs/pdf/FR359/FR359.pdf>
- 402 24. Uganda Bureau of Statistics - UBOS, ICF. Uganda Demographic and Health Survey 2016  
403 [Internet]. Kampala, Uganda: UBOS and ICF; 2018. Available from:  
404 <http://dhsprogram.com/pubs/pdf/FR333/FR333.pdf>
- 405 25. Bobo FT, Asante A, Woldie M, Dawson A, Hayen A. Child vaccination in sub-Saharan Africa:  
406 Increasing coverage addresses inequalities. *Vaccine*. 2022 Jan 3;40(1):141–50.
- 407 26. Revelle W. *psych: Procedures for Personality and Psychological Research* [Internet].  
408 Northwestern University, Evanston, Illinois, USA; 2021. Available from: [https://CRAN.R-](https://CRAN.R-project.org/package=psych)  
409 [project.org/package=psych](https://CRAN.R-project.org/package=psych)
- 410 27. Rosseel Y. **lavaan** : An R Package for Structural Equation Modeling. *J Stat Softw* [Internet]. 2012  
411 [cited 2022 Feb 15];48(2). Available from: <http://www.jstatsoft.org/v48/i02/>
- 412 28. Schumacker RE, Lomax RG. A beginner's guide to structural equation modeling [Internet]. 2010  
413 [cited 2022 Feb 15]. Available from: [http://www.123library.org/book\\_details/?id=75796](http://www.123library.org/book_details/?id=75796)
- 414 29. Kang H, Ahn JW. Model Setting and Interpretation of Results in Research Using Structural  
415 Equation Modeling: A Checklist with Guiding Questions for Reporting. *Asian Nurs Res*. 2021  
416 Aug 1;15(3):157–62.

- 417 30. Fourn L, Haddad S, Fournier P, Gansey R. Determinants of parents' reticence toward  
418 vaccination in urban areas in Benin (West Africa). *BMC Int Health Hum Rights*. 2009 Oct  
419 14;9(Suppl 1):S14.
- 420 31. Ruijs WLM, Hautvast JLA, van Ijzendoorn G, van Ansem WJC, van der Velden K, Hulscher MEJL.  
421 How orthodox protestant parents decide on the vaccination of their children: a qualitative  
422 study. *BMC Public Health*. 2012 Jun 6;12:408.
- 423 32. Streefland PH. Public doubts about vaccination safety and resistance against vaccination.  
424 *Health Policy Amst Neth*. 2001 Mar;55(3):159–72.
- 425 33. Brown KF, Kroll JS, Hudson MJ, Ramsay M, Green J, Long SJ, et al. Factors underlying parental  
426 decisions about combination childhood vaccinations including MMR: a systematic review.  
427 *Vaccine*. 2010 Jun 11;28(26):4235–48.
- 428 34. Olufowote JO. Local resistance to the global eradication of polio: newspaper coverage of the  
429 2003-2004 vaccination stoppage in northern Nigeria. *Health Commun*. 2011 Dec;26(8):743–53.
- 430 35. Renne E. Perspectives on polio and immunization in Northern Nigeria. *Soc Sci Med* 1982. 2006  
431 Oct;63(7):1857–69.
- 432 36. Tailoring Immunization Programmes (TIP) An introductory overview [Internet]. World Health  
433 Organisation; 2018. Available from:  
434 [https://www.who.int/immunization/programmes\\_systems/Global\\_TIP\\_overview\\_July2018.pdf](https://www.who.int/immunization/programmes_systems/Global_TIP_overview_July2018.pdf)
- 435 37. Vonasek BJ, Bajunirwe F, Jacobson LE, Twesigye L, Dahm J, Grant MJ, et al. Do Maternal  
436 Knowledge and Attitudes towards Childhood Immunizations in Rural Uganda Correlate with  
437 Complete Childhood Vaccination? *PloS One*. 2016;11(2):e0150131.
- 438 38. Tugumisirize F, Tumwine JK, Mworozzi EA. Missed opportunities and caretaker constraints to  
439 childhood vaccination in a rural area in Uganda. *East Afr Med J*. 2002 Jul;79(7):347–54.
- 440 39. Okafor IP, Dolapo DC, Onigbogi MO, Iloabuchi IG. Rural-urban disparities in maternal  
441 immunization knowledge and childhood health-seeking behavior in Nigeria: a mixed method  
442 study. *Afr Health Sci*. 2014 Jun;14(2):339–47.
- 443 40. Falagas ME, Zarkadoulia E. Factors associated with suboptimal compliance to vaccinations in  
444 children in developed countries: a systematic review. *Curr Med Res Opin*. 2008  
445 Jun;24(6):1719–41.
- 446 41. Chaturvedi S, Dasgupta R, Adhish V, Ganguly KK, Rai S, Sushant L, et al. Deconstructing social  
447 resistance to pulse polio campaign in two North Indian districts. *Indian Pediatr*. 2009  
448 Nov;46(11):963–74.
- 449 42. Khowaja AR, Khan SA, Nizam N, Omer SB, Zaidi A. Parental perceptions surrounding polio and  
450 self-reported non-participation in polio supplementary immunization activities in Karachi,  
451 Pakistan: a mixed methods study. *Bull World Health Organ*. 2012 Nov 1;90(11):822–30.
- 452 43. Taiwo L, Idris S, Abubakar A, Nguku P, Nsubuga P, Gidado S, et al. Factors affecting access to  
453 information on routine immunization among mothers of under 5 children in Kaduna State  
454 Nigeria, 2015. *Pan Afr Med J*. 2017 Jul 10;27:186.

- 455 44. The DHS Program - DHS Questionnaires [Internet]. [cited 2022 Feb 15]. Available from:  
456 <https://dhsprogram.com/methodology/survey-types/dhs-questionnaires.cfm>
- 457 45. Interpret of indices of CFA / SEM goodness of fit — interpret\_gfi [Internet]. [cited 2022 Mar 2].  
458 Available from: [https://easystats.github.io/effectsize/reference/interpret\\_gfi.html](https://easystats.github.io/effectsize/reference/interpret_gfi.html)
- 459 46. Oyo-Ita A, Bosch-Capblanch X, Ross A, Oku A, Esu E, Ameh S, et al. Effects of engaging  
460 communities in decision-making and action through traditional and religious leaders on  
461 vaccination coverage in Cross River State, Nigeria: A cluster-randomised control trial. PLOS  
462 ONE. 2021 Apr 16;16(4):e0248236.
- 463 47. Oku A, Oyo-Ita A, Glenton C, Fretheim A, Eteng G, Ames H, et al. Factors affecting the  
464 implementation of childhood vaccination communication strategies in Nigeria: a qualitative  
465 study. BMC Public Health. 2017 Feb 15;17(1):200.
- 466 48. Demand Creation for Polio Vaccine in Persistently Poor-Performing Communities of Northern  
467 Nigeria: 2013–2014 | The Journal of Infectious Diseases | Oxford Academic [Internet]. [cited  
468 2022 Feb 18]. Available from: [https://academic.oup.com/jid/article/213/suppl\\_3/S79/2236402](https://academic.oup.com/jid/article/213/suppl_3/S79/2236402)
- 469 49. Mummery WK, Brown WJ. Whole of community physical activity interventions: easier said than  
470 done. Br J Sports Med. 2009 Jan 1;43(1):39–43.
- 471 50. Stanley N, Humphreys C. Identifying the key components of a ‘whole family’ intervention for  
472 families experiencing domestic violence and abuse. J Gend-Based Violence. 2017 May  
473 1;1(1):99–115.
- 474 51. Bauer JJ. Selection Errors of Random Route Samples. Sociol Methods Res. 2014 Aug;43(3):519–  
475 44.
- 476 52. MacCallum RC, Widaman KF, Zhang S, Hong S. Sample size in factor analysis. Psychol Methods.  
477 1999;4(1):84–99.

478

### 479 **Supporting information captions**

480 S1 File. Sampling Protocols

481 S2 File. Questionnaires

482 S3 File. Country Analysis

medRxiv preprint doi: <https://doi.org/10.1101/2022.10.26.22281554>; this version posted November 1, 2022. The copyright holder for this preprint (which was not certified by peer review) is the author/funder, who has granted medRxiv a license to display the preprint in perpetuity. It is made available under a [CC-BY 4.0 International license](https://creativecommons.org/licenses/by/4.0/).

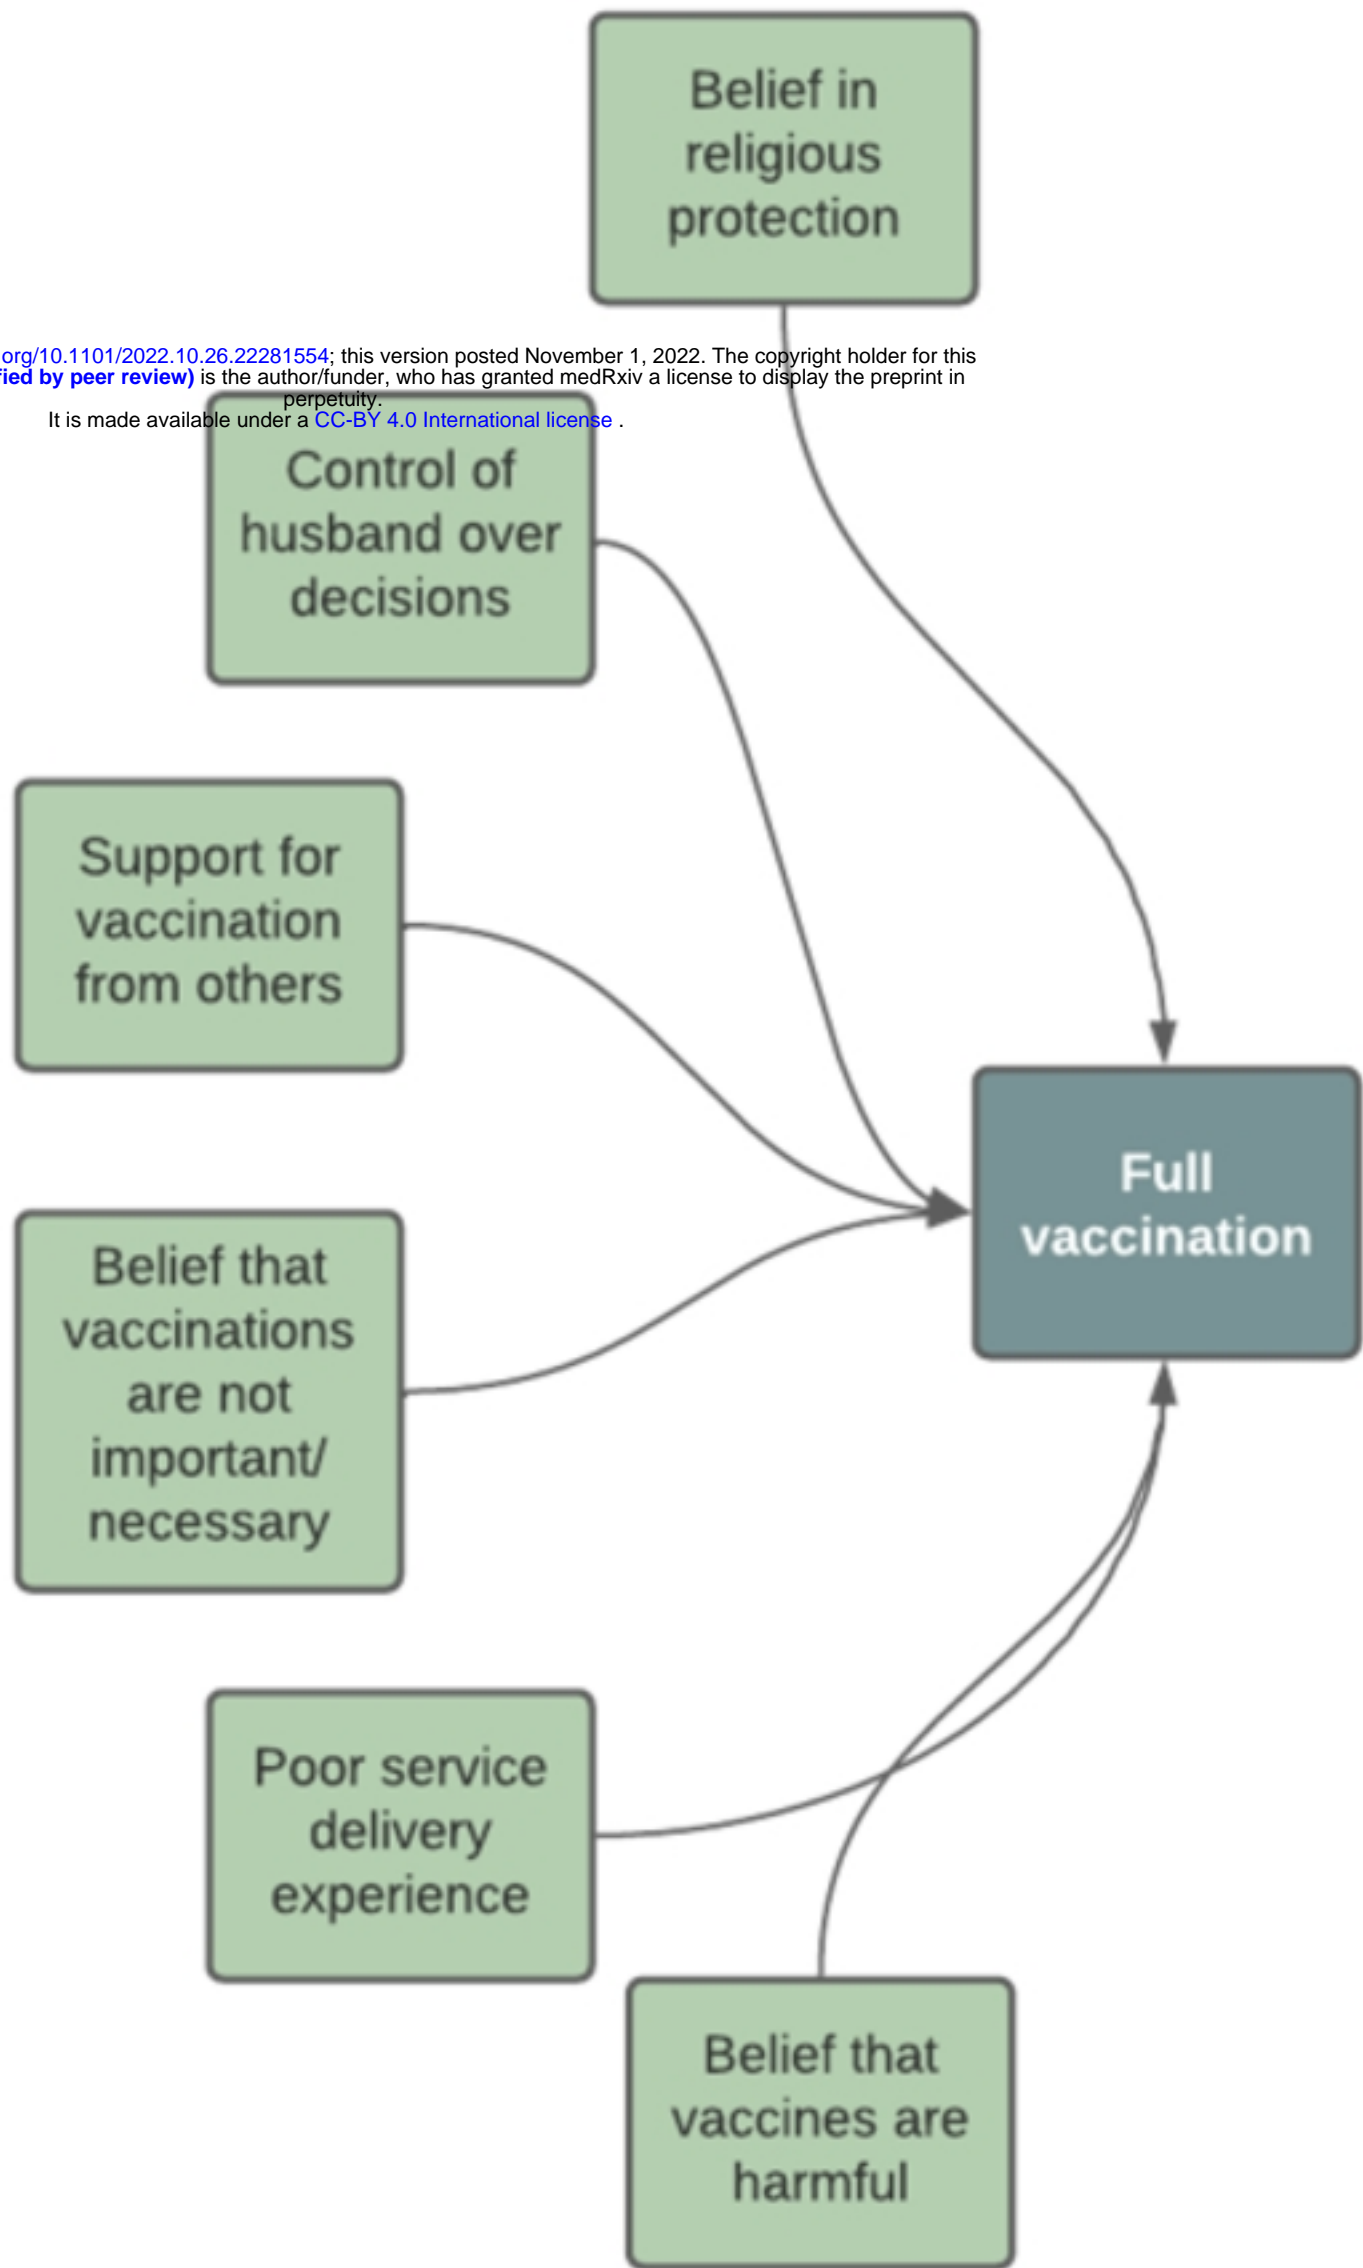

Figure
